# Supplementary material for: Elevated Uric Acid Is Associated With New‐Onset Atrial Fibrillation: Results From the Swedish AMORIS Cohort
Source: PubMed Central journal article supplement — J Am Heart Assoc. 2023 Jan 12;12(3):e027089. doi: 10.1161/JAHA.122.027089 (PMC9973652; doi:10.1161/jaha.122.027089), 2023-01-12
Supplement: JAH3-12-e027089-s001.pdf [file JAH3-12-e027089-s001.pdf]

# **SUPPLEMENTAL MATERIAL**

**Table S1. Incidence rate and hazard ratios (95% confidence interval) for AF associated with hyperuricemia and uric acid quartiles at baseline, in the total population and stratified by incident hypertension, diabetes, HF, or CHD.**

|                                                                                   | No. of subjects | No. of cases | IR per 1000 PY (95% CI) | HR (95% CI)      |                  |
|-----------------------------------------------------------------------------------|-----------------|--------------|-------------------------|------------------|------------------|
|                                                                                   |                 |              |                         | Model 1          | Model 2          |
| <b>Total cohort (N=339604)</b>                                                    |                 |              |                         |                  |                  |
| Hyperuricemia                                                                     |                 |              |                         |                  |                  |
| No                                                                                | 318575          | 42454        | 5.1 (5.1-5.2)           | 1.00             | 1.00             |
| Yes                                                                               | 21029           | 4062         | 8.3 (8.1-8.6)           | 1.50 (1.45-1.55) | 1.48 (1.43-1.53) |
| Uric acid quartiles                                                               |                 |              |                         |                  |                  |
| Q1                                                                                | 86738           | 10033        | 4.4 (4.3-4.5)           | 1.00             | 1.00             |
| Q2                                                                                | 83987           | 10629        | 4.8 (4.7-4.9)           | 1.06 (1.03-1.09) | 1.09 (1.06-1.12) |
| Q3                                                                                | 84617           | 11817        | 5.4 (5.3-5.5)           | 1.15 (1.12-1.18) | 1.19 (1.16-1.23) |
| Q4                                                                                | 84262           | 14037        | 6.8 (6.6-6.9)           | 1.40 (1.37-1.44) | 1.45 (1.41-1.49) |
| <b>Among those with incident hypertension, diabetes, HF, or CHD (n=153684)</b>    |                 |              |                         |                  |                  |
| Hyperuricemia                                                                     |                 |              |                         |                  |                  |
| No                                                                                | 140347          | 29019        | 7.7 (7.6-7.8)           | 1.00             | 1.00             |
| Yes                                                                               | 13337           | 3268         | 10.0 (9.7-10.4)         | 1.38 (1.33-1.43) | 1.40 (1.35-1.45) |
| Serum urate quartiles                                                             |                 |              |                         |                  |                  |
| Q1                                                                                | 32308           | 6234         | 7.2 (6.9-7.3)           | 1.00             | 1.00             |
| Q2                                                                                | 34835           | 7013         | 7.4 (7.2-7.5)           | 1.02 (0.99-1.06) | 1.06 (1.02-1.09) |
| Q3                                                                                | 39425           | 8352         | 7.9 (7.7-8.0)           | 1.09 (1.06-1.13) | 1.14 (1.11-1.18) |
| Q4                                                                                | 47116           | 10688        | 8.8 (8.7-9.0)           | 1.27 (1.23-1.31) | 1.34 (1.30-1.39) |
| <b>Among those without incident hypertension, diabetes, HF, or CHD (n=185920)</b> |                 |              |                         |                  |                  |
| Hyperuricemia                                                                     |                 |              |                         |                  |                  |
| No                                                                                | 178228          | 13435        | 3.0 (2.9-3.0)           | 1.00             | 1.00             |
| Yes                                                                               | 7692            | 794          | 4.9 (4.6-5.3)           | 1.46 (1.36-1.60) | 1.48 (1.37-1.59) |
| Serum urate quartiles                                                             |                 |              |                         |                  |                  |
| Q1                                                                                | 54430           | 3799         | 2.7 (2.6-2.8)           | 1.00             | 1.00             |
| Q2                                                                                | 49152           | 3616         | 2.9 (2.8-2.9)           | 1.05 (1.00-1.10) | 1.07 (1.02-1.12) |
| Q3                                                                                | 45192           | 3465         | 3.0 (2.9-3.2)           | 1.10 (1.05-1.15) | 1.13 (1.08-1.19) |
| Q4                                                                                | 37146           | 3349         | 3.9 (3.7-4.0)           | 1.33 (1.27-1.39) | 1.39 (1.32-1.46) |

**Model 1:** Adjusted for age and sex

**Model 2:** Adjusted for age, sex, total cholesterol, glucose, eGFR, and triglyceride at the time of uric acid measurement

HF=heart failure; CHD=coronary heart disease; IR=incidence rate; HR=hazard ratio; CI=confidence interval; PY=person-years

**Table S2. Hazard ratios (95% confidence interval) for AF associated with hyperuricemia and uric acid quartiles at baseline in the subsample with body mass index data (n=56851).**

|                            | No. of subjects | No. of cases | HR (95% CI)      |                  |
|----------------------------|-----------------|--------------|------------------|------------------|
|                            |                 |              | Model 1          | Model 2          |
| <b>Hyperuricemia</b>       |                 |              |                  |                  |
| No                         | 54024           | 6452         | 1.00             | 1.00             |
| Yes                        | 2827            | 510          | 1.44 (1.31-1.58) | 1.24 (1.14-1.37) |
| <b>Uric acid quartiles</b> |                 |              |                  |                  |
| Q1                         | 15179           | 1570         | 1.00             | 1.00             |
| Q2                         | 14524           | 1613         | 1.04 (0.97-1.11) | 1.00 (0.92-1.06) |
| Q3                         | 14368           | 1810         | 1.18 (1.10-1.27) | 1.09 (1.02-1.17) |
| Q4                         | 12780           | 1969         | 1.42 (1.32-1.52) | 1.21 (1.12-1.30) |

**Model 1:** Adjusted for age, sex, total cholesterol, glucose, eGFR, and triglyceride at baseline

**Model 2:** Model 1 + body mass index

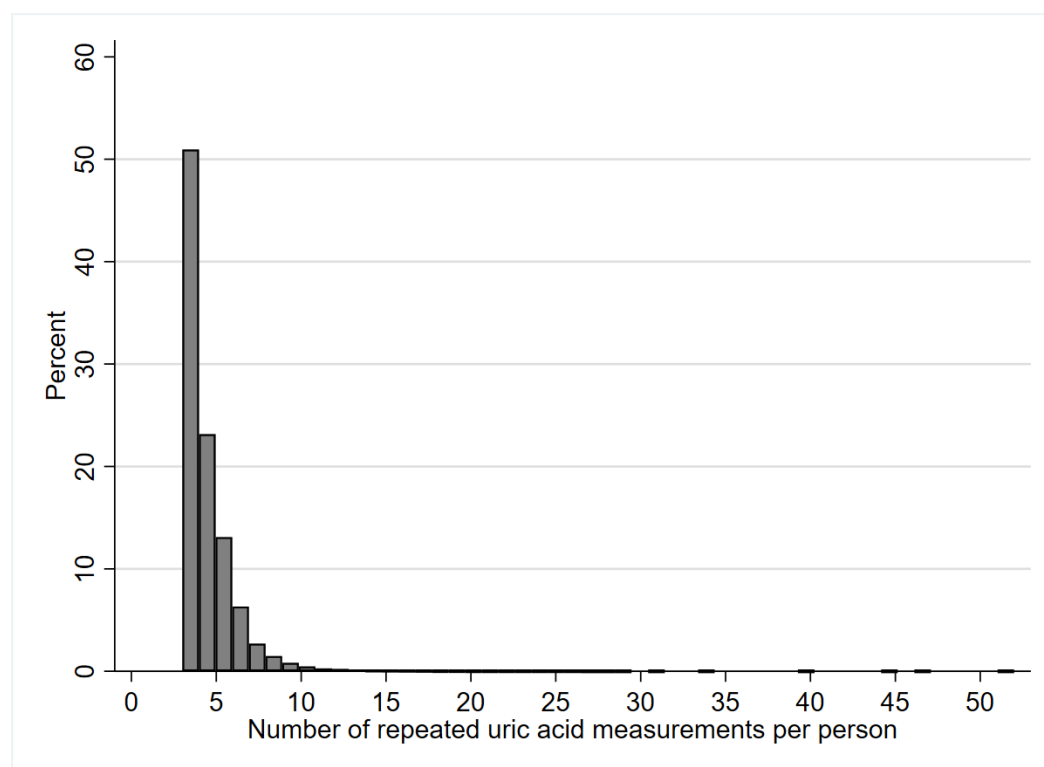

**Figure S1. Distribution of number of repeated uric acid measurements per person in the subsample (n=65754).**
